# Supplementary material for: Association of Health Status Metrics with Clinical Outcomes in Patients with Adult Congenital Heart Disease and Atrial Arrhythmias
Source: MDPI journal article supplement (doi:10.3390/jcm11206181), 2022-10-20
Supplement: s1 [file s1]

## **Supplementary Appendix**

### **Association of health status metrics with clinical outcomes in patients with adult congenital heart disease and atrial arrhythmias**

**This appendix has been provided by the authors to give readers additional information  
about their work.**

**Contents**

---

|                  |                                   |
|------------------|-----------------------------------|
| <b>Figure S1</b> | Flowchart of the study population |
|------------------|-----------------------------------|

---

|                 |                                                           |
|-----------------|-----------------------------------------------------------|
| <b>Table S1</b> | Hazard ratios for outcomes at a median 20-month follow-up |
|-----------------|-----------------------------------------------------------|

---

**Figure S1. Flowchart of the study population**

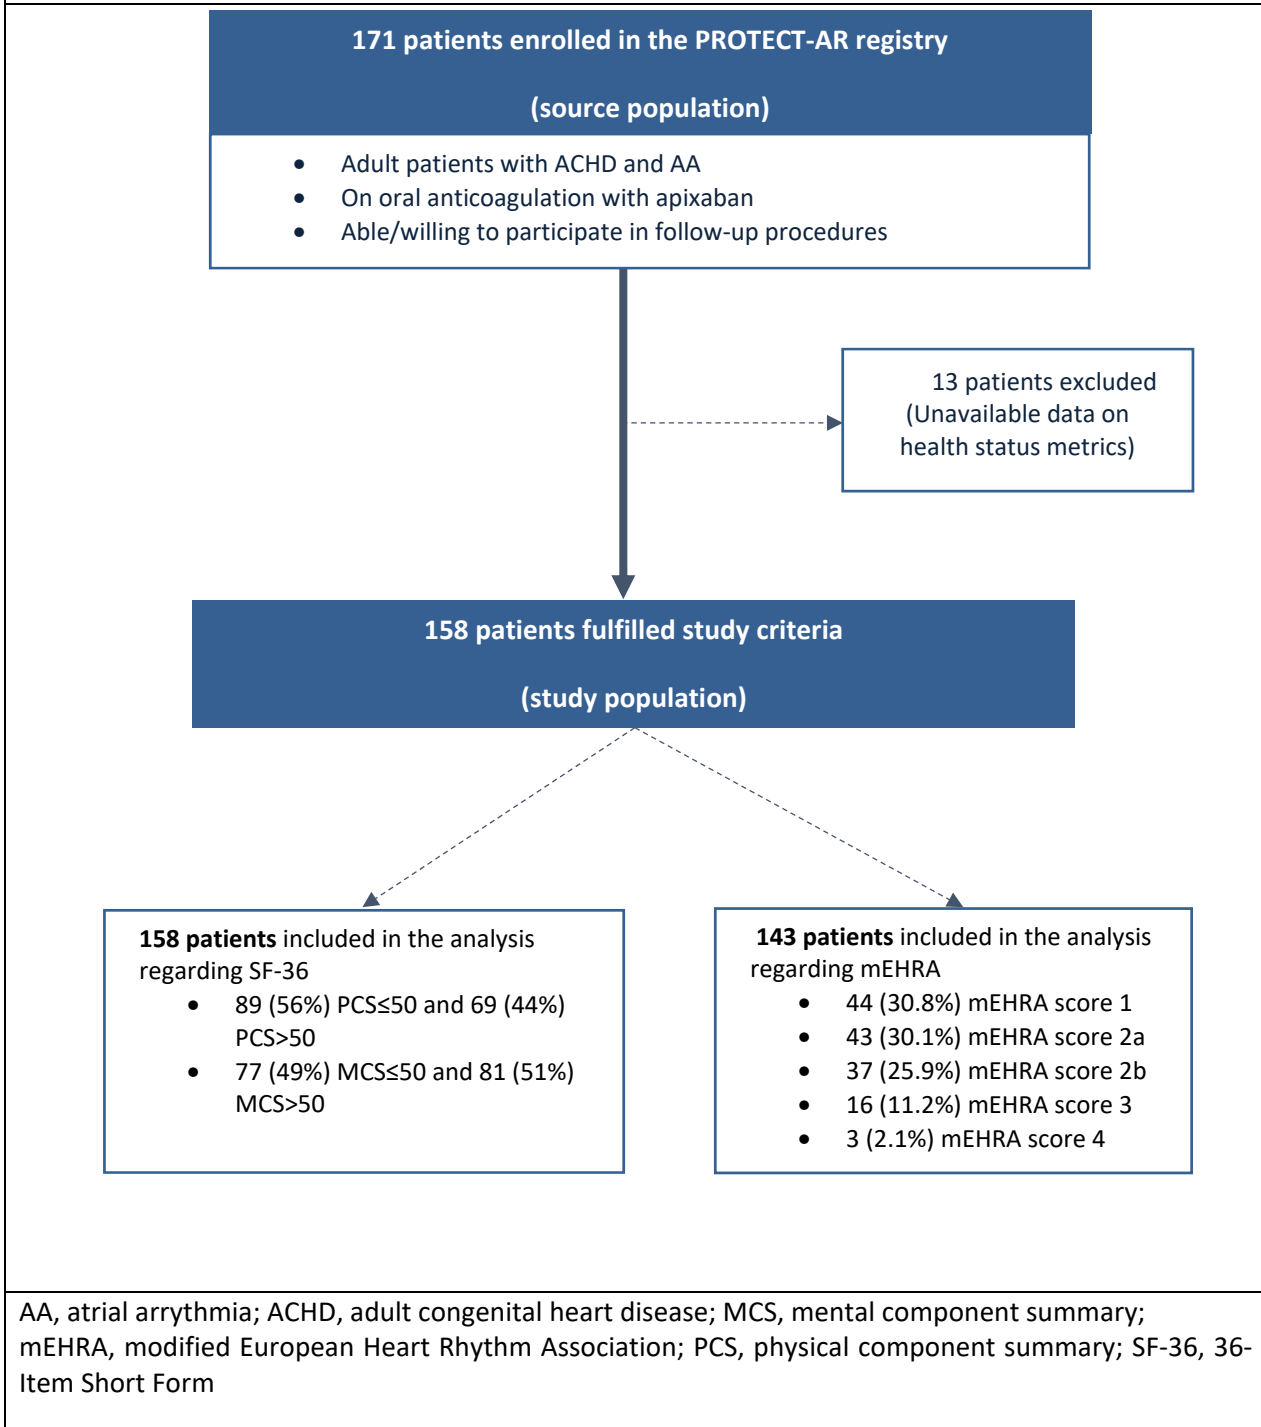

**Table S1. Hazard ratios for outcomes at a median 20-month follow-up.**

| <b>Outcomes</b>                                              | <b>Unadjusted HR<br/>(95% CI)</b> | <b>P-value</b> | <b>Adjusted HR<br/>(95% CI)</b> | <b>P-value</b> |
|--------------------------------------------------------------|-----------------------------------|----------------|---------------------------------|----------------|
| <b>Composite outcome</b>                                     |                                   |                |                                 |                |
| PCS $\leq$ 50                                                | 1.76 (0.31 to 1.03)               | 0.063          | 1.98 (1.02 to 3.84)             | 0.042          |
| MCS $\leq$ 50                                                | 1.64 (0.93 to 2.88)               | 0.088          | 1.41 (0.76 to 2.62)             | 0.283          |
| mEHRA score                                                  | 1.26 (0.98 to 1.62)               | 0.073          | 1.44 (1.03 to 2.00)             | 0.032          |
| <b>Components of the composite outcome</b>                   |                                   |                |                                 |                |
| <b>Mortality from any cause</b>                              |                                   |                |                                 |                |
| PCS $\leq$ 50                                                | 3.71 (0.42 to 33.23)              | 0.241          | 6.59 (0.53 to 81.53)            | 0.142          |
| MCS $\leq$ 50                                                | 1.01 (0.17 to 5.94)               | 0.993          | 1.21 (0.17 to 8.54)             | 0.847          |
| mEHRA score                                                  | 0.85 (0.35 to 2.05)               | 0.714          | 0.70 (0.25 to 1.96)             | 0.501          |
| <b>Major or clinically relevant non-major bleeding event</b> |                                   |                |                                 |                |
| PCS $\leq$ 50                                                | 2.36 (0.93 to 6.00)               | 0.071          | 3.31 (1.05 to 10.46)            | 0.042          |
| MCS $\leq$ 50                                                | 0.50 (0.21 to 1.51)               | 0.102          | 0.62 (0.23 to 1.67)             | 0.346          |
| mEHRA score                                                  | 1.19 (0.82 to 1.72)               | 0.361          | 1.73 (0.98 to 3.03)             | 0.055          |
| <b>Hospitalization for any cause</b>                         |                                   |                |                                 |                |
| PCS $\leq$ 50                                                | 1.14 (0.48 to 2.70)               | 0.769          | 1.01 (0.39 to 2.61)             | 0.979          |
| MCS $\leq$ 50                                                | 0.69 (0.29 to 1.64)               | 0.405          | 1.16 (0.45 to 2.99)             | 0.759          |
| mEHRA score                                                  | 1.36 (0.92 to 2.01)               | 0.122          | 1.39 (0.86 to 2.23)             | 0.182          |

Overview of the HRs for outcomes according to the PCS, MCS of the SF-36 and mEHRA score. PCS $>$ 50 and MCS $>$ 50 were used as reference. HRs with 95% confidence intervals and the respective p values are shown.

CI, confidence interval; HR, hazard ratio; MCS, mental component score; mEHRA score, modified European Heart Rhythm Association score; PCS, physical component score; SF-36, 36- Short Form-36.
